# Supplementary material for: A LysR-Type Transcriptional Regulator LcrX Is Involved in Virulence, Biofilm Formation, Swimming Motility, Siderophore Secretion, and Growth in Sugar Sources in Xanthomonas axonopodis Pv. glycines
Source: Front Plant Sci. 2020 Jan 10;10:1657. doi: 10.3389/fpls.2019.01657 (PMC6965072; doi:10.3389/fpls.2019.01657)
Supplement: Supplementary file 15 [file Table_7.xlsx]

## Sheet: Sheet1
Table S7. Classification of more abundant (>2 fold) proteins in XagΔlcrX(EV) using clusters of orthologous groups from the comparison between Xag(EV) and XagΔlcrX(EV)
COG function	Accession number	Identified proteins	Fold change[XagΔlcrX(EV)/(Xag(EV)]	p-value	Included in other group
C (Energy production and conversion)	AOY61955	tRNA (guanosine(46)-N7)-methyltransferase TrmB	*
	AOY64994	2-octaprenyl-3-methyl-6-methoxy-1 and4-benzoquinol hydroxylase	*		H
E (Amino Acid metabolism and transport)	AOY63528	histidine ammonia-lyase	*
	AOY63538	aminotransferase	*
	AOY64574	anthranilate phosphoribosyltransferase	*
	AOY61933	aminopeptidase	4.30213	2.37375e-06
G (Carbohydrate metabolism and transport)	AOY64409	endopolygalacturonase	*
	AOY64590	nucleoside-diphosphate sugar epimerase	*		M
H (Coenzyme transport and metabolism)	AOY61153	ferrochelatase	*
	AOY62228	pyridoxamine 5'-phosphate oxidase	*
	AOY64396	nicotinate phosphoribosyltransferase	*
I (Lipid metabolism)	AOY61935	carboxylesterase	*
	AOY63642	ubiquinone-binding protein	*
	AOY64398	endonuclease	*
	AOY64529	acetyl-CoA carboxylase and biotin carboxyl carrier protein	*
	AOY64723	carboxylesterase	*
J (Translation)	AOY61771	peptide deformylase	*
	AOY63456	tRNA pseudouridine(13) synthase TruD	*
	AOY62719	ribonuclease D	2.12173	0.0179333
K (Transcription)	AOY60730	NAD-dependent deacetylase	*
	AOY60897	LacI family transcriptional regulator	*
	AOY62371	Fur family transcriptional regulator	*
	AOY64051	transcriptional regulator	*
	AOY61874	bifunctional GTP diphosphokinase/guanosine-3' and5'-bis(diphosphate) 3'-diphosphatase	*		T
L (Replication, recombination and repair)	AOY60735	hydrolase TatD	*
	AOY64758	DNA helicase II	*
	AOY65045	resolvase (plasmid)	*
M (Cell wall/membrane/envelop biogenesis)	AOY61692	glycosyl transferase family 1	*
	AOY62145	glycosyl transferase	*
	AOY62328	UDP-N-acetylmuramoylalanine--D-glutamate ligase	*
	AOY63671	phospholipase	*
	AOY64413	rod shape-determining protein MreC	*
	AOY64442	hypothetical protein	*
	AOY64360	iron dicitrate transport regulator FecR	2.94548	0.0166562
N(Cell motility)	AOY62314	type IV pili twitching motility protein PilT	2.26113	0.008201	U
O (Post-translational modification, protein turnover, and chaperones)	AOY63609	glutathione peroxidase	*
	AOY63766	peptidylprolyl isomerase	*
	AOY63858	DNA repair protein RadA	*
	AOY63930	thioredoxin reductase	*
	AOY64172	putative Fe-S cluster assembly protein SufT	*
	AOY62452	protease	3.72741	0.0142792
	AOY64455	peptidase M16	2.0434	0.000545055
P (Inorganic ion transport and metabolism)	AOY61371	catalase	*
	AOY61680	TonB-dependent receptor	*
	AOY62471	TonB-dependent receptor	*
	AOY63050	hypothetical protein	*
	AOY63588	phosphate ABC transporter ATP-binding protein	*
	AOY64358	TonB-dependent receptor	*
	AOY64784	Na+/H+ antiporter	*
	AOY64240	ABC transporter substrate-binding protein	5.97625	0.000463025
	AOY64259	nitrate ABC transporter substrate-binding protein	2.37733	0.0061344
S (Function Unknown)	AOY60876	hypothetical protein	*
	AOY61769	hypothetical protein	*
	AOY62058	Avirulence protein AvrBs3 faimliy	*
	AOY62128	hypothetical protein	*
	AOY62240	avirulence protein	*
	AOY64946	hypothetical protein	*
	AOY60717	FMN reductase	*
	AOY61112	tryptophan halogenase	*
	AOY61119	hypothetical protein	*
	AOY61314	cupin	*
	AOY61333	hypothetical protein	*
	AOY61605	glutathione peroxidase	*
	AOY61661	peptidoglycan-binding protein	*
	AOY61681	folate hydrolase	*
	AOY62064	GNAT family N-acetyltransferase	*
	AOY62304	SET domain-containing protein-lysine N-methyltransferase	*
	AOY62632	Tat pathway signal protein	*
	AOY62783	hypothetical protein	*
	AOY63059	stress-induced protein	*
	AOY63421	UDP-N-acetylglucosamine acyltransferase	*
	AOY63444	GTPase HflX	*
	AOY63905	outer protein P	*
	AOY63912	oligopeptide transporter and OPT family	*
	AOY64353	endonuclease	*
	AOY64846	23S rRNA (adenine(2030)-N(6))-methyltransferase RlmJ	*
	AOY65030	HpaF protein	*
	AOY60980	phage tail protein	2.71592	0.00524199
	AOY61471	DUF1338 domain-containing protein	2.03281	0.0206025
	AOY63740	hypothetical protein	2.18217	0.0233015
	AOY64490	lipase	3.46652	0.00208089
T (Signal transduction mechanisms)	AOY61104	phytochrome	*
	AOY62345	carbon starvation protein A	*
	AOY65013	hypothetical protein	*
U (Intracellular trafficking, secretion, and vesicular transport)	AOY62565	hypothetical protein	*
	AOY64630	EscC/YscC/HrcC family type III secretion system outer membrane ring protein	*
	AOY64642	aldolase	*
	AOY61883	fimbrial protein	2.50371	0.0429279
	AOY61738	hypothetical protein	*		W
V (Defense mechanisms)	AOY63611	multidrug ABC transporter ATP-binding protein	*
* Indicates the protein detected in XagΔlcrX(EV)
